# Supplementary material for: Myeloid-Specific Acly Deletion Alters Macrophage Phenotype In Vitro and In Vivo without Affecting Tumor Growth
Source: MDPI journal article supplement (doi:10.3390/cancers13123054), 2021-06-19

# Myeloid-Specific Acly Deletion Alters Macrophage Phenotype *In Vitro* And *In Vivo* without Affecting Tumor Growth

## Supplementary Files

### Supplementary Table S1: List of antibodies used.

| Target                | Clone       | Fluorochrome | Company        |
|-----------------------|-------------|--------------|----------------|
| CD8a                  | 53-6.7      | BV421        | Biolegend      |
| CD4                   | RM4-5       | BV510        | Biolegend      |
| Ly6C                  | HK1.4       | BV605        | Biolegend      |
| CD11c                 | N418        | BV650        | Biolegend      |
| CD64                  | X54-5/7.1   | BV711        | Biolegend      |
| CD45                  | 30-F11      | BV785        | Biolegend      |
| Ly6G                  | 1A8         | FITC         | Biolegend      |
| MHCII                 | M5/114.15.2 | PerCP-Cy5.5  | Biolegend      |
| CD19                  | 6D5         | PE           | Biolegend      |
| CD11b                 | M1/70       | PE-Cy7       | Biolegend      |
| NK1.1                 | PK136       | APC          | Biolegend      |
| CD3                   | 17A2        | AF700        | Biolegend      |
| Fixable Viability Dye | n/a         | eFluor 780   | eBioscience    |
| IL-4R $\alpha$        | mIL4R-M1    | BV421        | BD Biosciences |
| CD273                 | TY25        | BV510        | BD Biosciences |
| CD80                  | 16-10A1     | BV650        | Biolegend      |
| iNOS                  | CXNFT       | APC          | eBioscience    |
| Arg1                  | A1exF5      | PE           | eBioscience    |
| CD11c                 | N418        | AF700        | eBioscience    |
| NK1.1                 | PK136       | APC-Cy7      | BD Biosciences |
| CD3                   | 17A2        | APC-Cy7      | Biolegend      |
| CD19                  | 6D5         | APC-Cy7      | Biolegend      |
| CD206                 | C068C2      | BV421        | Biolegend      |
| CD40                  | 3/23        | BV510        | BD Biosciences |
| CD43                  | S7          | BV650        | BD Biosciences |
| CD86                  | GL-1        | APC          | Biolegend      |
| CD301                 | LOM-14      | PE           | Biolegend      |

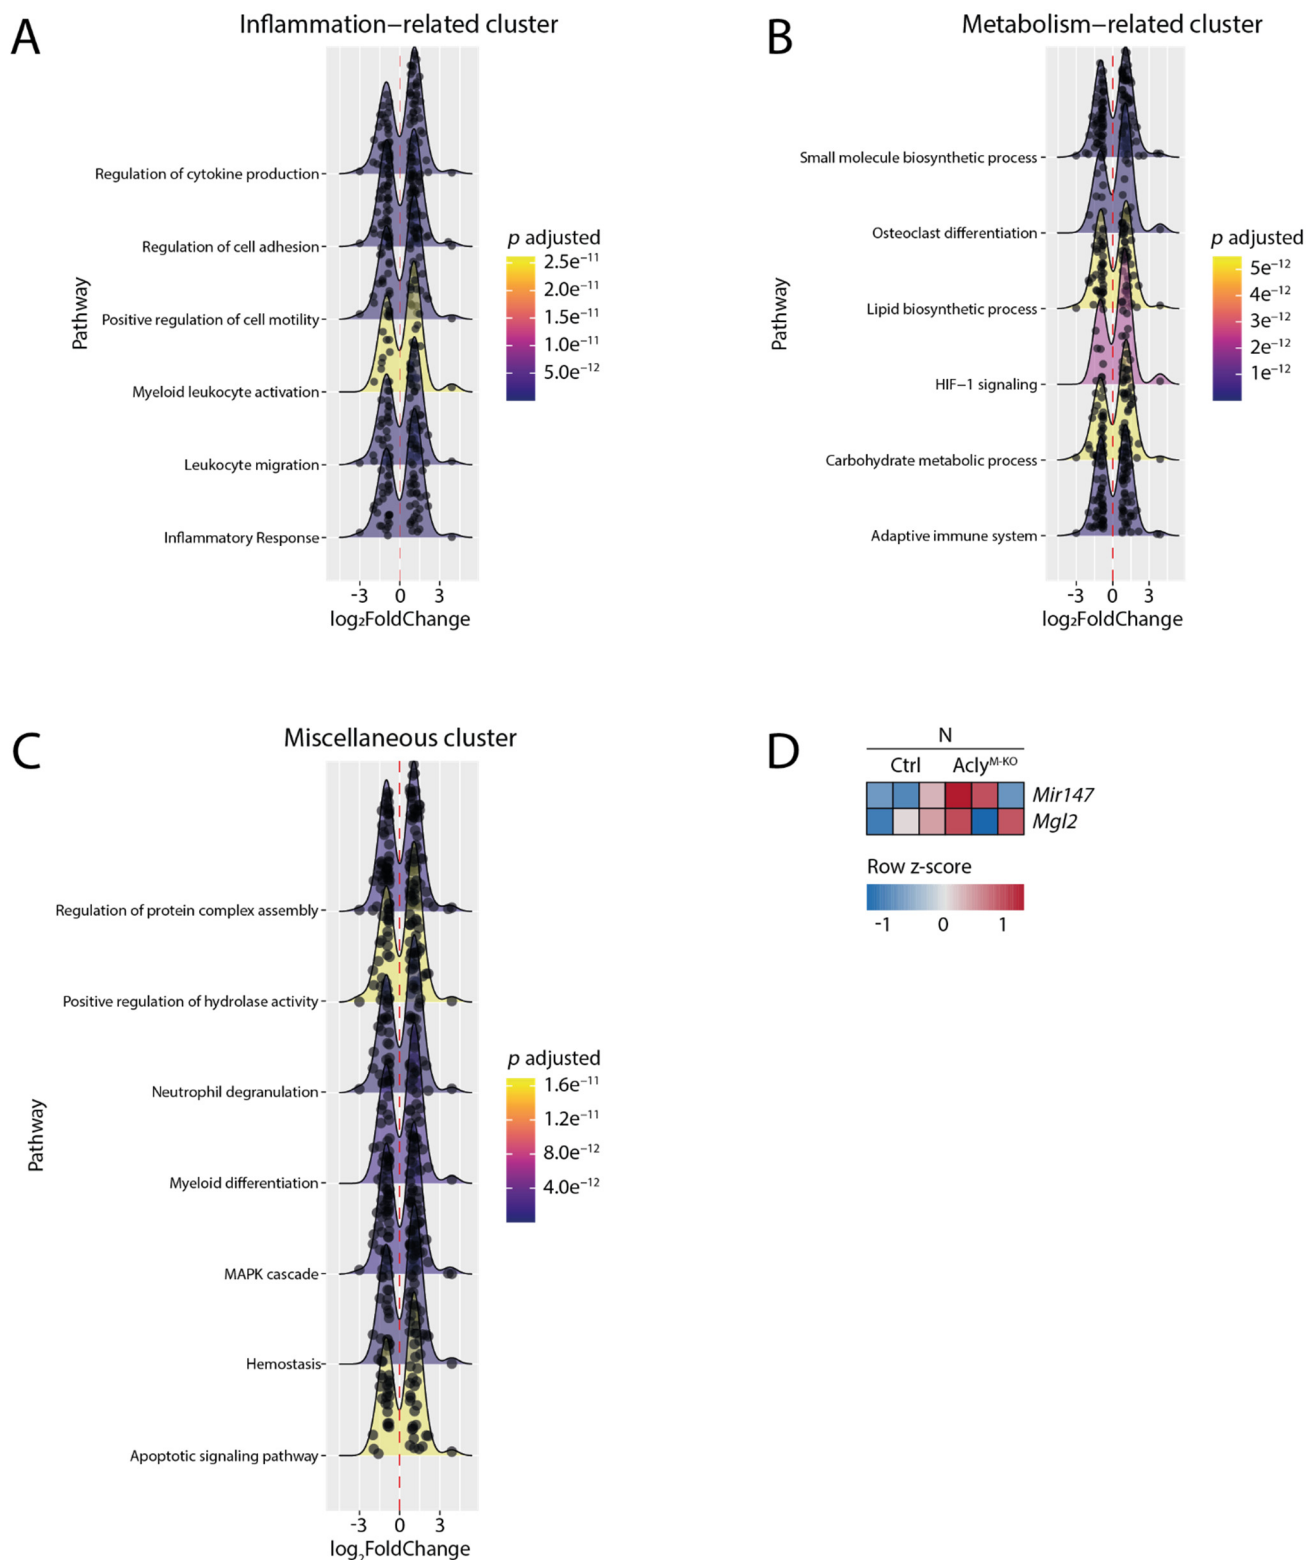

**Supplementary Figure S1.** Acly<sup>M-KO</sup> BMDMs do not show directionality in their IL-4-induced pathways and IL-4-induced genes are not affected at baseline. Ridgeline plots of differentially regulated pathways as identified in Figure 1B-D for the inflammation-related cluster (A), metabolism-related cluster (B) and miscellaneous cluster (C). Log<sub>2</sub>FoldChange of genes involved in the plotted pathways are shown on the x axis and color of the distributions represents pathway

adjusted p-value. (D) Significantly regulated IL-4-induced genes are not significantly regulated in unstimulated BMDMs.

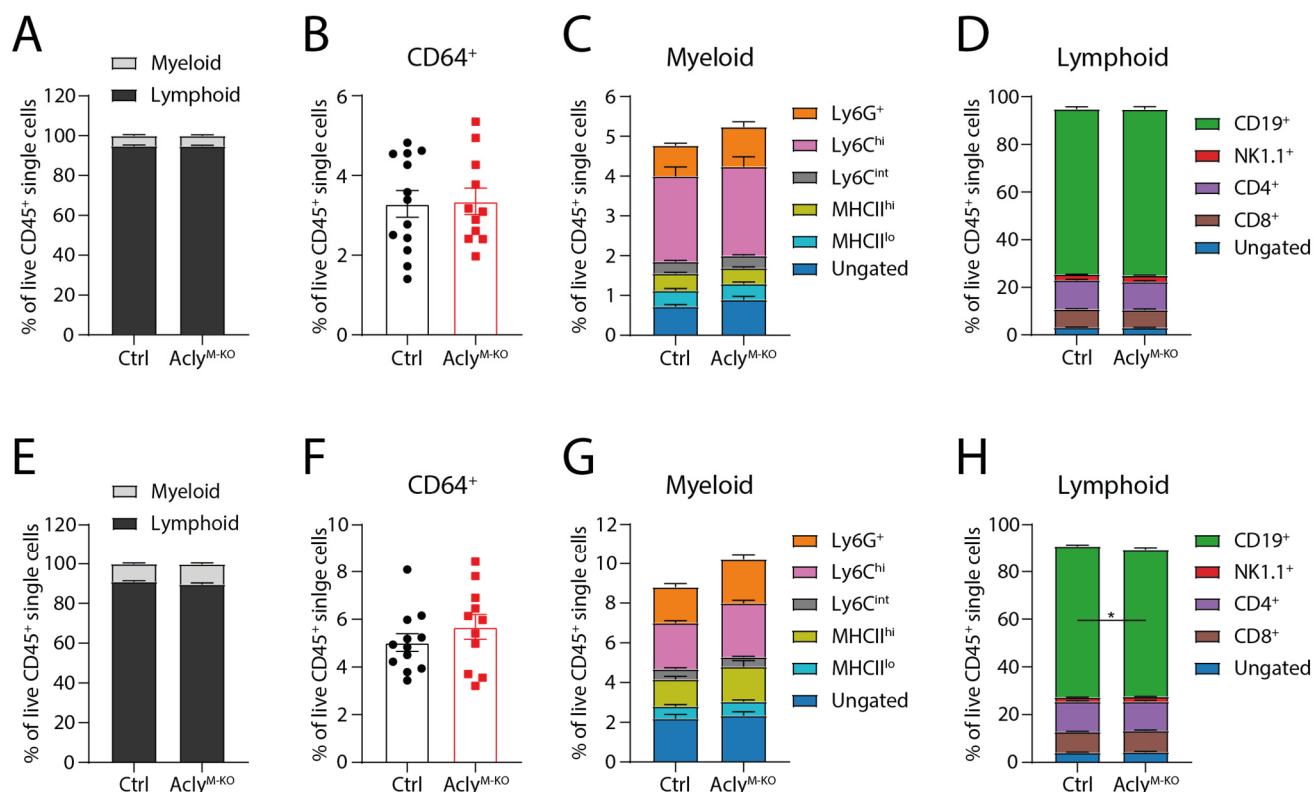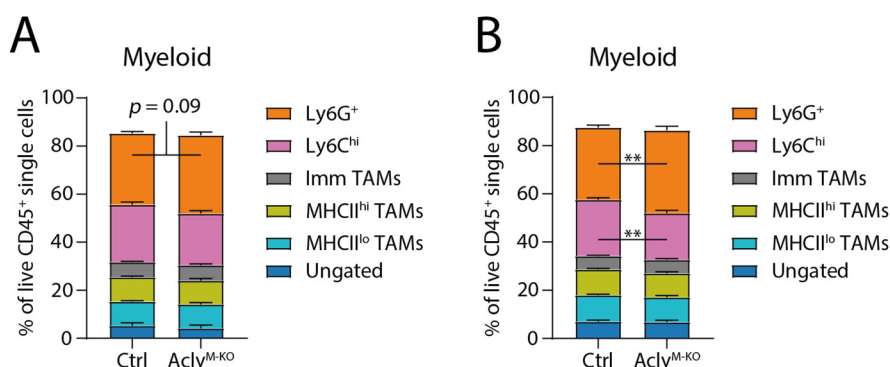

Supplement: s1 [file s1]
